# Supplementary material for: In Vitro Toxicity Screening of Fifty Complex Mixtures in HepG2 Cells
Source: MDPI journal article supplement (doi:10.3390/toxics12020126), 2024-02-02
Supplement: s1 [file s1]

# In vitro toxicity screening of fifty complex mixtures in HepG2 cells

Sunmi Kim <sup>1,\*</sup>, Kyounghee Kang <sup>1</sup>, Haena Kim <sup>1,2</sup> and Myungwon Seo <sup>1</sup>

**Table S1.** Fifty kinds of mixture combinations in this study.

| Mixtures   |           | Chemicals and their compositions (%) in complex mixture |         |        |         |         |        |        |         |        |        |
|------------|-----------|---------------------------------------------------------|---------|--------|---------|---------|--------|--------|---------|--------|--------|
| Mixture 1  | Chemicals | PFHxS                                                   | 2,4DCP  | 2,5DCP | pPB     | bPB     | Hg     | Cu     | Se      | Pb     |        |
| (n = 9)    | MF* (%)   | 7.286                                                   | 20.358  | 18.915 | 16.714  | 11.878  | 0.716  | 0.331  | 0.261   | 23.540 |        |
| Mixture 2  | Chemicals | PFNA                                                    | PFOA    | BP-3   | TCS     | pPB     | Hg     | Cd     | Sb      |        |        |
| (n = 8)    | MF (%)    | 14.304                                                  | 17.557  | 26.524 | 0.588   | 31.488  | 1.348  | 0.098  | 8.092   |        |        |
| Mixture 3  | Chemicals | BP-3                                                    | bPB     | Co     | Cu      | Pb      | Cd     | Se     | Zn      | Sb     | Ni     |
| (n = 10)   | MF (%)    | 14.133                                                  | 11.924  | 16.960 | 0.333   | 23.631  | 0.052  | 0.262  | 15.112  | 4.312  | 13.282 |
| Mixture 4  | Chemicals | TEHP                                                    | TDCPP   | EHDPPH | TPhP    | TnBP    | TCPP   | TBOEP  |         |        |        |
| (n = 7)    | MF (%)    | 26.287                                                  | 14.065  | 8.575  | 5.273   | 16.557  | 17.389 | 11.854 |         |        |        |
| Mixture 5  | Chemicals | 2,4-DCP                                                 | 2,5-DCP | pPB    | bPB     | BP-3    | TCS    | TnBP   | TPhP    | TCPP   |        |
| (n = 9)    | MF (%)    | 19.058                                                  | 17.707  | 15.646 | 11.120  | 13.179  | 0.292  | 9.708  | 3.093   | 10.196 |        |
| Mixture 6  | Chemicals | PFNA                                                    | PFOA    | PFHxS  | EHDPPH  | TBOEP   | TDCPP  | TEHP   | TPhP    |        |        |
| (n = 8)    | MF (%)    | 14.451                                                  | 17.738  | 13.868 | 10.224  | 14.134  | 16.769 | 6.529  | 6.287   |        |        |
| Mixture 7  | Chemicals | Co                                                      | Cu      | Pb     | Cd      | Se      | Zn     | Sb     | Hg      | Ni     |        |
| (n = 6)    | MF (%)    | 22.715                                                  | 0.446   | 31.651 | 0.070   | 0.351   | 20.240 | 5.774  | 0.962   | 17.790 |        |
| Mixture 8  | Chemicals | Pb                                                      | Cd      | Zn     | Hg      | TBOEP   | TDCPP  | TEHP   |         |        |        |
| (n = 7)    | MF (%)    | 39.880                                                  | 0.088   | 25.503 | 1.212   | 12.580  | 14.926 | 5.811  |         |        |        |
| Mixture 9  | Chemicals | PFNA                                                    | PFOA    | PFHxS  | 2,4-DCP | 2,5-DCP | pPB    | bPB    | BP-3    | TCS    |        |
| (n = 9)    | MF (%)    | 7.133                                                   | 8.755   | 6.845  | 19.125  | 17.770  | 15.701 | 11.159 | 13.218  | 0.293  |        |
| Mixture 10 | Chemicals | PFNA                                                    | PFOA    | PFHxS  | Co      | Cu      | Se     | Sb     | Ni      |        |        |
| (n = 8)    | MF (%)    | 12.823                                                  | 15.739  | 12.305 | 28.533  | 0.560   | 0.441  | 7.253  | 22.346  |        |        |
| Mixture 11 | Chemicals | PFOA                                                    | PFHxS   | Pb     | Hg      | Zn      | TDCPP  | TPhP   | 2,5-DCP | bPB    |        |
| (n = 9)    | MF (%)    | 9.430                                                   | 7.373   | 23.821 | 0.724   | 15.233  | 8.916  | 3.343  | 19.140  | 12.019 |        |
| Mixture 12 | Chemicals | PFNA                                                    | PFHxS   | Co     | Se      | Hg      | TnBP   | TDCPP  |         |        |        |
| (n = 7)    | MF (%)    | 14.620                                                  | 14.030  | 32.533 | 0.503   | 1.378   | 19.971 | 16.966 |         |        |        |
| Mixture 13 | Chemicals | PFHxS                                                   | BP-3    | TCS    | TnBP    | EHDPPH  | TBOEP  | Cd     | Sb      | Ni     |        |
| (n = 9)    | MF (%)    | 11.673                                                  | 22.543  | 0.500  | 16.616  | 8.606   | 11.898 | 0.083  | 6.881   | 21.199 |        |
| Mixture 14 | Chemicals | PFOA                                                    | 2,5-DCP | TCS    | TBOEP   | TDCPP   | Zn     | Cu     | Hg      |        |        |
| (n = 8)    | MF (%)    | 15.307                                                  | 31.067  | 0.513  | 12.197  | 14.471  | 24.726 | 0.544  | 1.175   |        |        |
| Mixture 15 | Chemicals | 2,4-DCP                                                 | Cd      | Se     | Zn      | Sb      | EHDPPH | TBOEP  | TDCPP   | TEHP   |        |
| (n = 9)    | MF (%)    | 31.292                                                  | 0.080   | 0.401  | 23.139  | 6.601   | 8.257  | 11.414 | 13.543  | 5.272  |        |
| Mixture 16 | Chemicals | 2,4-DCP                                                 | 2,5-DCP | BP-3   | Cd      | Ni      | Pb     | Zn     |         |        |        |
| (n = 7)    | MF (%)    | 19.348                                                  | 17.976  | 13.372 | 0.050   | 12.575  | 22.373 | 14.307 |         |        |        |
| Mixture 17 | Chemicals | PFHxS                                                   | BP-3    | pPB    | TnBP    | TPhP    | Pb     | Co     | Cu      | Ni     |        |
| (n = 9)    | MF (%)    | 6.890                                                   | 13.306  | 15.806 | 9.808   | 3.124   | 22.263 | 15.977 | 0.313   | 12.513 |        |

|            |           |         |         |         |         |        |        |        |        |       |
|------------|-----------|---------|---------|---------|---------|--------|--------|--------|--------|-------|
| Mixture 18 | Chemicals | PFNA    | PFOA    | PFHxS   | 2,5-DCP | BP-3   | Se     | Ni     | Pb     |       |
| (n = 8)    | MF (%)    | 8.059   | 9.891   | 7.733   | 20.076  | 14.934 | 0.277  | 14.043 | 24.986 |       |
| Mixture 19 | Chemicals | bPB     | 2,5-DCP | TCS     | TBOEP   | TCPP   | TEHP   | Zn     | Ni     | Hg    |
| (n = 9)    | MF (%)    | 14.511  | 23.108  | 0.382   | 9.072   | 13.307 | 4.191  | 18.391 | 16.164 | 0.874 |
| Mixture 20 | Chemicals | PFHxS   | PFNA    | pPB     | Zn      | Ni     | TCPP   | TnBP   |        |       |
| (n = 7)    | MF (%)    | 8.980   | 9.357   | 20.598  | 18.553  | 16.307 | 13.424 | 12.782 |        |       |
| Mixture 21 | Chemicals | PFHxS   | Pb      | PFNA    | Co      | TPhP   | EHDPHP | TBOEP  | TDCPP  |       |
| (n = 8)    | MF (%)    | 9.082   | 29.343  | 9.464   | 21.059  | 4.117  | 6.696  | 9.256  | 10.982 |       |
| Mixture 22 | Chemicals | PFHxS   | 2,4-DCP | 2,5-DCP | bPB     | BP-3   | TPhP   | EHDPHP | TBOEP  |       |
| (n = 8)    | MF (%)    | 8.223   | 22.975  | 21.347  | 13.405  | 15.879 | 3.728  | 6.062  | 8.381  |       |
| Mixture 23 | Chemicals | PFHxS   | 2,4-DCP | 2,5-DCP | pPB     | TCS    | TnBP   | TCPP   | TDCPP  |       |
| (n = 8)    | MF (%)    | 7.779   | 21.736  | 20.196  | 17.845  | 0.333  | 11.073 | 11.630 | 9.407  |       |
| Mixture 24 | Chemicals | 2,4-DCP | pPB     | Sb      | TnBP    | TCPP   | EHDPHP | TBOEP  | TDCPP  |       |
| (n = 8)    | MF (%)    | 24.167  | 19.841  | 5.098   | 12.312  | 12.930 | 6.377  | 8.815  | 10.459 |       |
| Mixture 25 | Chemicals | 2,5-DCP | pPB     | Sb      | PFOA    | TCS    | Zn     | EHDPHP | TDCPP  |       |
| (n = 8)    | MF (%)    | 24.007  | 21.212  | 5.451   | 11.828  | 0.396  | 19.106 | 6.817  | 11.182 |       |
| Mixture 26 | Chemicals | PFHxS   | 2,4-DCP | pPB     | Zn      | TnBP   | TPhP   | TCPP   | TBOEP  |       |
| (n = 8)    | MF (%)    | 7.971   | 22.273  | 18.285  | 16.470  | 11.347 | 3.614  | 11.917 | 8.124  |       |
| Mixture 27 | Chemicals | 2,4-DCP | 2,5-DCP | PFNA    | Zn      | TCPP   | EHDPHP | TBOEP  | TDCPP  |       |
| (n = 8)    | MF (%)    | 21.561  | 20.033  | 8.041   | 15.944  | 11.536 | 5.689  | 7.865  | 9.331  |       |
| Mixture 28 | Chemicals | 2,4-DCP | 2,5-DCP | Sb      | PFNA    | PFOA   | BP-3   | Ni     | TEHP   |       |
| (n = 8)    | MF (%)    | 22.320  | 20.738  | 4.709   | 8.324   | 10.217 | 15.426 | 14.506 | 3.761  |       |
| Mixture 29 | Chemicals | 2,5-DCP | PFNA    | PFOA    | Co      | Zn     | TDCPP  | Cu     | Cd     |       |
| (n = 8)    | MF (%)    | 24.575  | 9.864   | 12.108  | 21.950  | 19.558 | 11.447 | 0.431  | 0.068  |       |
| Mixture 30 | Chemicals | PFHxS   | PFNA    | TCS     | Ni      | TnBP   | Hg     | Cu     | Cd     |       |
| (n = 8)    | MF (%)    | 18.264  | 19.033  | 0.783   | 33.167  | 25.998 | 1.794  | 0.831  | 0.131  |       |
| Mixture 31 | Chemicals | PFHxS   | Sb      | TCS     | Co      | Ni     | TBOEP  | Cu     | Cd     |       |
| (n = 8)    | MF (%)    | 14.622  | 8.619   | 0.627   | 33.906  | 26.553 | 14.903 | 0.665  | 0.105  |       |
| Mixture 32 | Chemicals | Sb      | Co      | TnBP    | TPhP    | TCPP   | TBOEP  | TDCPP  | Cd     |       |
| (n = 8)    | MF (%)    | 6.922   | 27.230  | 16.716  | 5.324   | 17.556 | 11.969 | 14.200 | 0.084  |       |
| Mixture 33 | Chemicals | PFHxS   | Sb      | PFNA    | Zn      | TnBP   | TDCPP  | TEHP   | Hg     |       |
| (n = 8)    | MF (%)    | 10.321  | 6.084   | 10.756  | 21.326  | 14.692 | 12.481 | 23.326 | 1.014  |       |
| Mixture 34 | Chemicals | bPB     | TCS     | TnBP    | TPhP    | EHDPHP | TDCPP  | Hg     | Cu     |       |
| (n = 8)    | MF (%)    | 28.905  | 0.760   | 25.238  | 8.038   | 13.071 | 21.440 | 1.741  | 0.806  |       |
| Mixture 35 | Chemicals | PFHxS   | 2,4-DCP | 2,5-DCP | bPB     | TCS    | Co     | Ni     | TBOEP  |       |
| (n = 8)    | MF (%)    | 7.566   | 21.140  | 19.642  | 12.334  | 0.324  | 17.544 | 13.739 | 7.711  |       |
| Mixture 36 | Chemicals | PFHxS   | 2,4-DCP | Sb      | TCS     | Zn     | Ni     | TCPP   | EHDPHP |       |
| (n = 8)    | MF (%)    | 9.487   | 26.508  | 5.592   | 0.407   | 19.602 | 17.228 | 14.183 | 6.994  |       |
| Mixture 37 | Chemicals | bPB     | Sb      | PFNA    | BP-3    | TnBP   | TBOEP  | TDCPP  | Cd     |       |
| (n = 8)    | MF (%)    | 18.417  | 6.659   | 11.772  | 21.816  | 16.081 | 11.514 | 13.661 | 0.081  |       |
| Mixture 38 | Chemicals | PFHxS   | 2,4-DCP | bPB     | TnBP    | TPhP   | Hg     | Cu     | Cd     |       |
| (n = 8)    | MF (%)    | 8.371   | 39.681  | 23.152  | 20.215  | 6.438  | 1.395  | 0.646  | 0.102  |       |
| Mixture 39 | Chemicals | PFNA    | PFOA    | TnBP    | TCPP    | EHDPHP | TBOEP  | TEHP   | Cd     |       |

|            |           |         |         |        |        |        |        |        |        |
|------------|-----------|---------|---------|--------|--------|--------|--------|--------|--------|
| (n = 8)    | MF (%)    | 11.250  | 13.808  | 15.367 | 16.139 | 7.959  | 11.003 | 24.398 | 0.077  |
| Mixture 40 | Chemicals | Sb      | PFOA    | BP-3   | TCS    | Zn     | TnBP   | TPhP   | Hg     |
| (n = 8)    | MF (%)    | 7.477   | 16.224  | 24.495 | 0.544  | 26.208 | 18.056 | 5.751  | 1.246  |
| Mixture 41 | Chemicals | PFHxS   | Sb      | PFOA   | Zn     | Ni     | TnBP   | TBOEP  | TDCPP  |
| (n = 8)    | MF (%)    | 9.613   | 5.666   | 12.296 | 19.862 | 17.457 | 13.684 | 9.798  | 11.624 |
| Mixture 42 | Chemicals | PFHxS   | BP-3    | TCS    | Ni     | TnBP   | EHDPHP | Hg     | Cu     |
| (n = 8)    | MF (%)    | 14.096  | 27.221  | 0.604  | 25.597 | 20.065 | 10.392 | 1.384  | 0.641  |
| Mixture 43 | Chemicals | 2,4-DCP | Sb      | PFOA   | BP-3   | TCS    | TBOEP  | TDCPP  | Cd     |
| (n = 8)    | MF (%)    | 31.493  | 6.644   | 14.416 | 21.766 | 0.483  | 11.488 | 13.629 | 0.081  |
| Mixture 44 | Chemicals | PFHxS   | Sb      | Zn     | Ni     | TPhP   | TBOEP  | TDCPP  | Cd     |
| (n = 8)    | MF (%)    | 12.254  | 7.223   | 25.319 | 22.253 | 5.556  | 12.489 | 14.818 | 0.088  |
| Mixture 45 | Chemicals | bPB     | PFNA    | PFOA   | BP-3   | EHDPHP | TEHP   | Cu     | Cd     |
| (n = 8)    | MF (%)    | 18.251  | 11.666  | 14.319 | 21.620 | 8.254  | 25.301 | 0.509  | 0.080  |
| Mixture 46 | Chemicals | PFHxS   | Sb      | Co     | Zn     | Ni     | TCPP   | EHDPHP | TDCPP  |
| (n = 8)    | MF (%)    | 8.903   | 5.248   | 20.645 | 18.396 | 16.168 | 13.310 | 6.564  | 10.766 |
| Mixture 47 | Chemicals | PFHxS   | 2,5-DCP | Co     | Zn     | TPhP   | TCPP   | TEHP   | Hg     |
| (n = 8)    | MF (%)    | 8.138   | 21.128  | 18.871 | 16.815 | 3.690  | 12.167 | 18.392 | 0.799  |
| Mixture 48 | Chemicals | 2,5-DCP | TCS     | Pb     | EHDPHP | TBOEP  | Hg     | Cu     | Cd     |
| (n = 8)    | MF (%)    | 33.381  | 0.551   | 41.544 | 9.479  | 13.105 | 1.263  | 0.585  | 0.092  |
| Mixture 49 | Chemicals | 2,5-DCP | bPB     | PFNA   | PFOA   | TCS    | EHDPHP | TBOEP  | TDCPP  |
| (n = 8)    | MF (%)    | 27.167  | 17.060  | 10.905 | 13.385 | 0.449  | 7.715  | 10.666 | 12.654 |
| Mixture 50 | Chemicals | 2,4-DCP | Sb      | PFNA   | PFOA   | BP-3   | Pb     | TCPP   | TBOEP  |
| (n = 8)    | MF (%)    | 20.881  | 4.405   | 7.788  | 9.559  | 14.432 | 24.146 | 11.172 | 7.617  |

\*MF: Mole fraction (moles of single substance divided by total moles of mixture solution).

**Table S2.** Dose–response curve model information of target complex mixtures in HepG2 cytotoxicity assays.

| No.        | Dose–Response Curve model <sup>1</sup> |          |         |          |                         |
|------------|----------------------------------------|----------|---------|----------|-------------------------|
|            | Model                                  | $\alpha$ | $\beta$ | $\gamma$ | Adjusted R <sup>2</sup> |
| Mixture 1  | Gompertz                               | 97.32    | 152.7   | 338.3    | 0.950                   |
| Mixture 2  | Sigmoid                                | 97.98    | 59.02   | 304.2    | 0.985                   |
| Mixture 3  | Chapman                                | 613.1    | 0.0003  | 2.150    | 0.970                   |
| Mixture 4  | Sigmoid                                | 98.50    | 107.4   | 409.5    | 0.976                   |
| Mixture 5  | Gompertz                               | 103.0    | 262.0   | 294.0    | 0.960                   |
| Mixture 6  | Sigmoid                                | 101.0    | 56.40   | 237.0    | 0.985                   |
| Mixture 7  | Sigmoid                                | 101.0    | 100.0   | 382.0    | 0.977                   |
| Mixture 8  | Sigmoid                                | 97.10    | 54.90   | 363.0    | 0.974                   |
| Mixture 9  | Sigmoid                                | 99.34    | 79.38   | 505.7    | 0.980                   |
| Mixture 10 | Logistic                               | 103.0    | 4.23    | 379.0    | 0.961                   |
| Mixture 11 | Sigmoid                                | 98.40    | 105.0   | 491.0    | 0.962                   |
| Mixture 12 | Gompertz                               | 103.0    | 72.10   | 187.0    | 0.971                   |
| Mixture 13 | Sigmoid                                | 102.0    | 66.70   | 302.0    | 0.991                   |
| Mixture 14 | Sigmoid                                | 99.60    | 26.30   | 299.0    | 0.978                   |
| Mixture 15 | Hill                                   | 98.60    | 8.70    | 340.0    | 0.980                   |

|            |          |          |       |          |       |
|------------|----------|----------|-------|----------|-------|
| Mixture 16 | Hill     | 6.51E+06 | 1.06  | 6.35E+07 | 0.941 |
| Mixture 17 | Sigmoid  | 104.0    | 148.0 | 572.0    | 0.973 |
| Mixture 18 | Sigmoid  | 129.0    | 367.0 | 1090     | 0.962 |
| Mixture 19 | Gompertz | 102.0    | 94.80 | 400.0    | 0.981 |
| Mixture 20 | Gompertz | 105.0    | 218.8 | 691.6    | 0.963 |
| Mixture 21 | Sigmoid  | 102.0    | 100.9 | 344.4    | 0.985 |
| Mixture 22 | Sigmoid  | 100.0    | 60.80 | 357.0    | 0.988 |
| Mixture 23 | Gompertz | 101.0    | 118.0 | 289.0    | 0.984 |
| Mixture 24 | Sigmoid  | 99.20    | 47.60 | 397.0    | 0.986 |
| Mixture 25 | Sigmoid  | 98.50    | 51.90 | 336.0    | 0.990 |
| Mixture 26 | Hill     | 102.0    | 7.28  | 472.0    | 0.984 |
| Mixture 27 | Sigmoid  | 98.67    | 48.33 | 401.5    | 0.987 |
| Mixture 28 | Chapman  | 99.60    | 0.01  | 34.50    | 0.989 |
| Mixture 29 | Hill     | 100.4    | 8.29  | 349.1    | 0.989 |
| Mixture 30 | Chapman  | 101.0    | 0.03  | 533.0    | 0.985 |
| Mixture 31 | Chapman  | 101.0    | 0.01  | 14.10    | 0.987 |
| Mixture 32 | Sigmoid  | 101.0    | 43.20 | 312.0    | 0.984 |
| Mixture 33 | Sigmoid  | 97.20    | 29.80 | 337.0    | 0.989 |
| Mixture 34 | Sigmoid  | 99.30    | 21.90 | 206.0    | 0.987 |
| Mixture 35 | Chapman  | 101.3    | 0.01  | 22.40    | 0.972 |
| Mixture 36 | Chapman  | 98.57    | 0.01  | 463.7    | 0.951 |
| Mixture 37 | Sigmoid  | 99.60    | 55.00 | 235.0    | 0.986 |
| Mixture 38 | Sigmoid  | 100.0    | 35.00 | 249.0    | 0.988 |
| Mixture 39 | Sigmoid  | 101.0    | 71.80 | 318.0    | 0.989 |
| Mixture 40 | Sigmoid  | 98.90    | 41.50 | 300.0    | 0.989 |
| Mixture 41 | Sigmoid  | 98.48    | 58.61 | 359.9    | 0.978 |
| Mixture 42 | Chapman  | 100.3    | 0.03  | 1345     | 0.955 |
| Mixture 43 | Hill     | 99.20    | 8.52  | 284.5    | 0.984 |
| Mixture 44 | Chapman  | 98.59    | 0.02  | 182.2    | 0.967 |
| Mixture 45 | Chapman  | 98.87    | 0.04  | 1.82E+04 | 0.984 |
| Mixture 46 | Sigmoid  | 101.6    | 79.8  | 428.7    | 0.975 |
| Mixture 47 | Chapman  | 102.2    | 0.005 | 24.34    | 0.966 |
| Mixture 48 | Sigmoid  | 99.74    | 37.17 | 262.7    | 0.980 |
| Mixture 49 | Logistic | 99.02    | 27.68 | 285.7    | 0.981 |
| Mixture 50 | Hill     | 97.83    | 7.20  | 467.5    | 0.983 |

<sup>1</sup> All the dataset was applied nonlinear regression method with 3-parameter sigmoidal models (sigmoid, logistic, Chapman, Weibull, Hill, and Gompertz). The final model equations in Table 2 are below: sigmoid:  $f = a/(1+\exp(-(x-x_0)/b))$ ; logistic:  $f = \text{if}(x \leq 0, \text{if}(b < 0, 0, a), \text{if}(b > 0, a/(1+\exp(-(x-x_0)/b)), a \cdot \exp(-(x-x_0)/b))$ ; Chapman:  $f = a \cdot (1 - \exp(-b \cdot x))^c$ ; Gompertz:  $f = a \cdot \exp(-\exp(-(x-x_0)/b))$ .

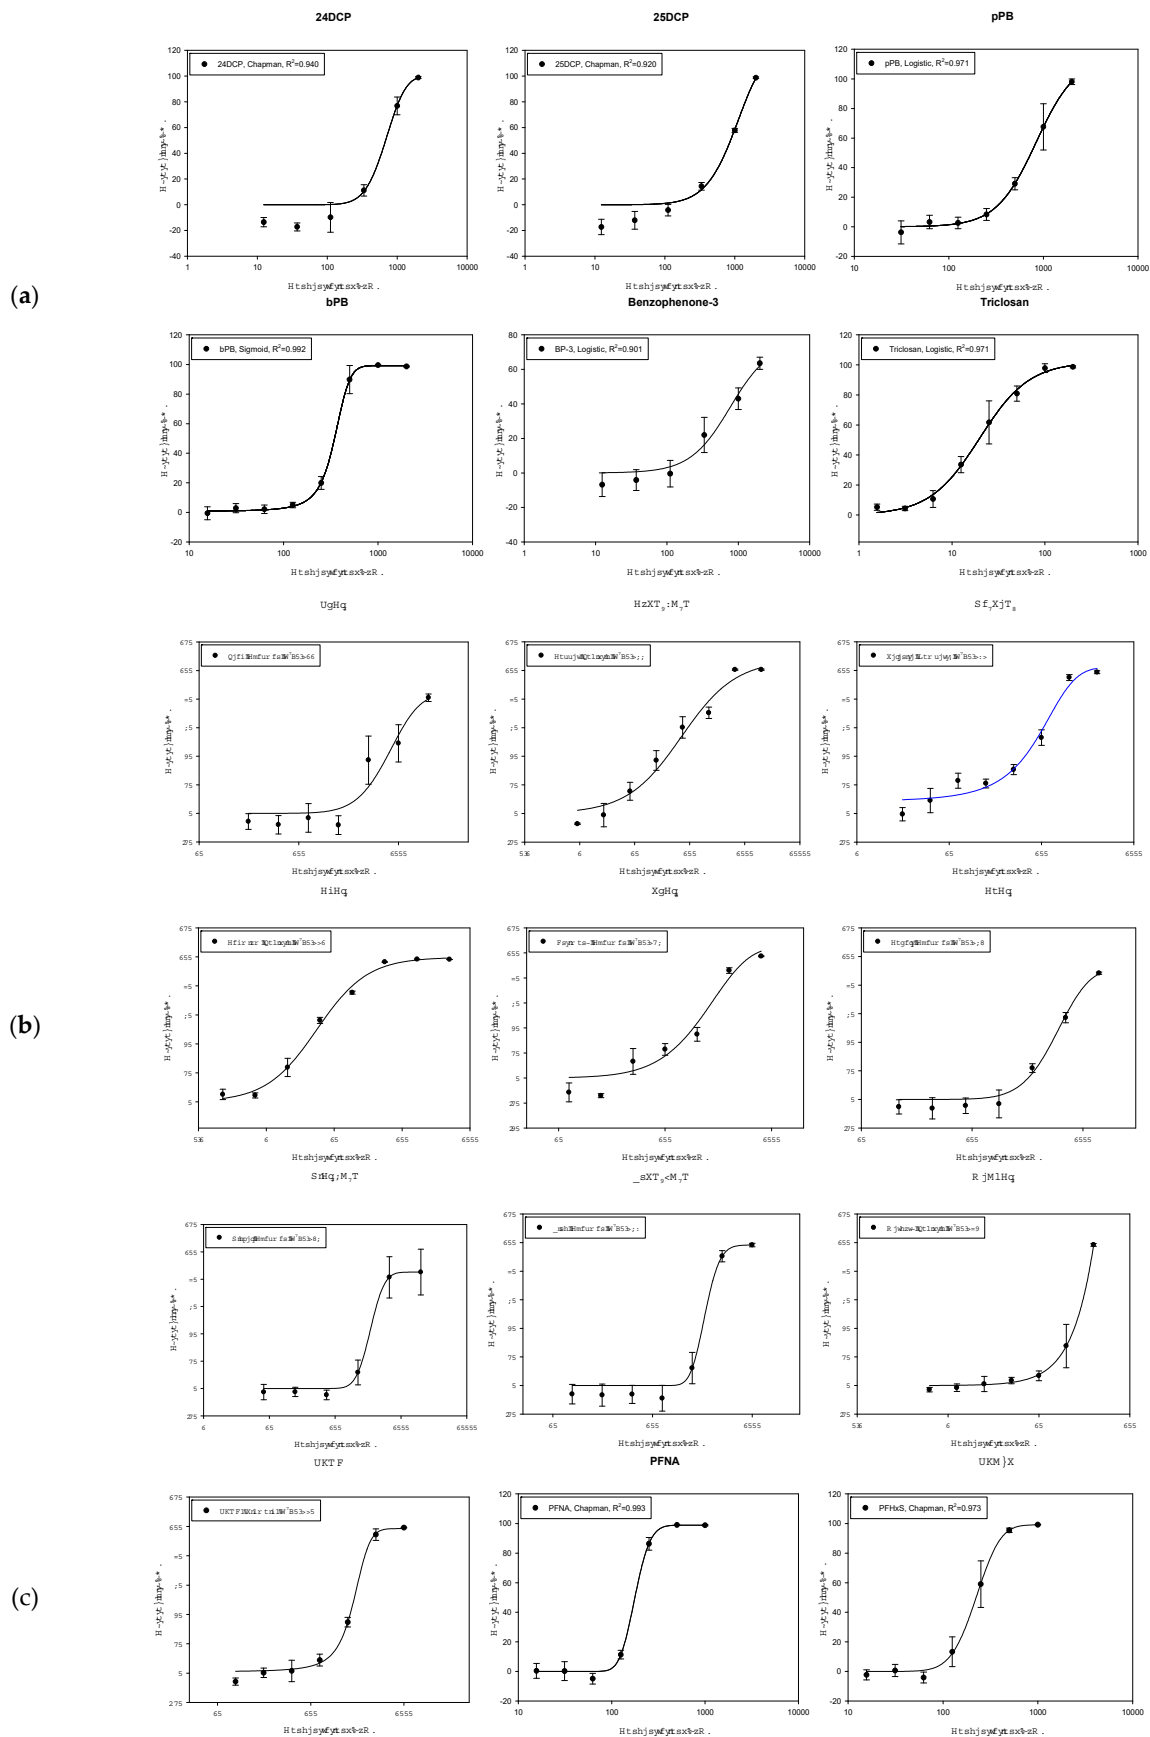

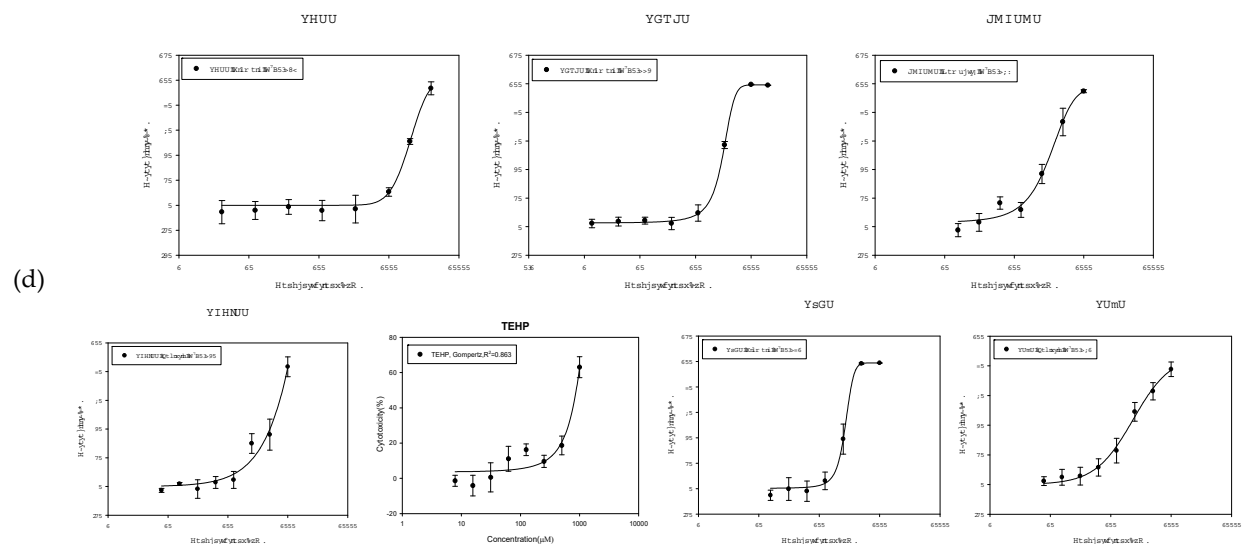

**Figure S1.** Dose–response curves of target single substances: (a) Environmental phenols; (b) heavy metals and their compounds; (c) per- and polyfluoroalkyl substances (PFAS); (d) organophosphate flame retardants (OPFRs). All experiments were conducted according to three independent replicates using difference cell passages. Dose–response curves were fitted using the best-fit model selection among non-linear sigmoid functions of three parameters (sigmoid, logistic, Gompertz, Weibull, Hill, and Chapman models). Fitted regression model and adjusted R squares are presented.
